# Supplementary material for: Determinants of Acceptance of Weight Management Applications in Overweight and Obese Individuals: Using an Extended Unified Theory of Acceptance and Use of Technology Model
Source: MDPI journal article supplement (doi:10.3390/nu14091968), 2022-05-08
Supplement: s1 [file s1]

## Supplementary Material

**Table S1.** Supplement Materials I: Translated items of the UTAUT questionnaire used in this study.

| Instruction    | German                                                                                                   | English Translation                                                                    |
|----------------|----------------------------------------------------------------------------------------------------------|----------------------------------------------------------------------------------------|
|                | Bitte bewerten Sie im Folgenden jede Aussage, inwieweit Sie dieser zustimmen oder nicht zustimmen.       | In the following, please rate for each statement to what extent you agree or disagree. |
| Items          | German                                                                                                   | English Translation                                                                    |
| 1.             | Ich würde gerne eine Gewichts-Management App ausprobieren.                                               | I would like to try a weight management app.                                           |
| 2.             | Ich würde eine Gewichts-Management App nutzen, wenn es mir angeboten würde.                              | I would use a weight management app if offered.                                        |
| 3.             | Ich würde eine Gewichts-Management App meinen Freunden empfehlen.                                        | I would recommend a weight management app to my friends.                               |
| 4.             | Personen, die mir nahe stehen würden die Nutzung einer Gewichts-Management App gut heißen.               | People close to me would approve of using a weight management app.                     |
| 5.             | Mein Hausarzt würde die Verwendung einer Gewichts Management App gut heißen.                             | My family doctor would approve of using a weight management app.                       |
| 6.             | Meine Freunde würden eine Gewichts-Management App gut heißen.                                            | My friends would approve of a weight management app.                                   |
| 7.             | Eine Gewichts-Management App könnte mein allgemeines Wohlbefinden verbessern.                            | A weight management app could improve my overall well-being.                           |
| 8.             | Eine Gewichts-Management App könnte mir bei Stress helfen.                                               | A weight management app could help me with stress.                                     |
| 9.             | Eine Gewichts-Management App könnte mir helfen, meine persönliche (psychische) Gesundheit zu verbessern. | A weight management app could help me improve my personal (mental) health.             |
| 10.            | Die Nutzung einer Gewichts-Management App wäre keine zusätzliche Last für mich.                          | Using a weight management app would not be an additional burden for me.                |
| 11.            | Eine Gewichts-Management App wäre einfach zu bedienen und zu verstehen.                                  | A weight management app would be easy to use and understand.                           |
| 12.            | Eine Gewichts-Management App könnte ich in meinen Alltag einbauen.                                       | I could incorporate a weight management app into my everyday life.                     |
| answer options | German                                                                                                   | English Translation                                                                    |
| 1.             | stimme gar nicht zu                                                                                      | I fully disagree                                                                       |
| 2.             | stimme eher nicht zu                                                                                     | I tend to disagree                                                                     |
| 3.             | weiß nicht                                                                                               | I don't know                                                                           |
| 4.             | stimme eher zu                                                                                           | I tend to agree                                                                        |
| 5.             | stimme voll zu                                                                                           | I fully agree                                                                          |

*Note.* Shown above is the modified UTAUT questionnaire [1] on weight management apps used in this study. Since the online survey was conducted with a German-speaking sample, the original online survey content is listed in the German column, while the respective translations are listed in the English Translation column for clarity.

## References

1. Venkatesh; Morris; Davis. User Acceptance of Information Technology: Toward a Unified View. *MIS Quarterly* **2003**, *27*, 425, doi:10.2307/30036540.
